# Supplementary material for: A topology and risk-aware access control framework for cyber-physical space
Source: Springer Nature journal article supplement (doi:10.1007/s11704-019-8454-0), 2020-01-03
Supplement: 11704_2019_8454_MOESM1_ESM.pdf [file 11704_2019_8454_MOESM1_ESM.pdf]

# A topology and risk-aware access control framework for cyber-physical space

**Yan CAO, Zhiqiu HUANG, Yaoshen YU, Changbo KE,  
Zihao WANG**

Frontiers of Computer Science, DOI: [10.1007/s11704-019-8454-0](https://doi.org/10.1007/s11704-019-8454-0)

# Problems & Ideas

- **Problems:** the interplay between the cyber world and physical world in the cyber-physical space proposes specific security requirements that are not captured by traditional access control frameworks.
  - The interplay between these two worlds proposes four types of security threats, including cyber threats, physical threats, cyber-enabled physical threats , and physical-enabled cyber threats. Hence, the physical security, the cyber security, and the interaction security should be all concerned in the access control model for the cyber-physical space
  - The bad results caused by failure in providing secure policy enforcement may directly affect the controlled physical world.
- **Ideas:** we propose an effective access control framework for the cyber-physical space.
  - A unified access control model TAAC is proposed. It integrates the physical access control, the cyber access control, and the interaction access control.
  - A more rigorous policy enforcement method is needed to mitigate insider attacks.

# Main Contributions

**Table 2:** Role-permission assignment relation

| Num      | PA                                                                                                                                                                                                                   | Risk |
|----------|----------------------------------------------------------------------------------------------------------------------------------------------------------------------------------------------------------------------|------|
| $p_1$    | $(\text{visitor}, \text{enter}, \text{staffoffice}, SL(\text{visitor}, \text{mainarea}) \wedge (SL(\text{employee}, \text{staffoffice}) \vee SL(\text{manager}, \text{staffoffice})))$                               | 20   |
| $p_2$    | $(\text{visitor}, \text{enter}, \text{mainarea}, SL(\text{visitor}, \text{staffoffice}))$                                                                                                                            | -10  |
| $p_3$    | $(\text{visitor}, \text{login}, \text{cloudlet}, SL(\text{visitor}, \text{mainarea}) \wedge AL(\text{cloudlet}, \text{serverroom}))$                                                                                 | 30   |
| $p_4$    | $(\text{visitor}, \text{copy}, \text{file3}, SL(\text{visitor}, \text{mainarea}) \wedge SA(\text{visitor}, \text{cloudlet}) \wedge AL(\text{file3}, \text{cloudlet}) \wedge AL(\text{cloudlet}, \text{serverroom}))$ | 20   |
| $p_5$    | $(\text{visitor}, \text{delete}, \text{file3}, SL(\text{visitor}, \text{mainarea}) \wedge AL(\text{file3}, \text{visitor}[\text{phone}]))$                                                                           | -10  |
| $p_6$    | $(\text{visitor}, \text{logout}, \text{cloudlet}, SL(\text{visitor}, \text{mainarea}) \wedge AL(\text{cloudlet}, \text{serverroom}) \wedge SA(\text{visitor}, \text{cloudlet}))$                                     | -20  |
| $p_7$    | $(\text{employee}, \text{enter}, \text{staffoffice}, SL(\text{employee}, \text{mainarea}))$                                                                                                                          | 10   |
| $p_8$    | $(\text{employee}, \text{login}, \text{server}, SL(\text{employee}, \text{staffoffice}) \wedge AL(\text{server}, \text{serverroom}))$                                                                                | 20   |
| $p_9$    | $(\text{employee}, \text{copy}, \text{file1}, SL(\text{employee}, \text{staffoffice}) \wedge AL(\text{file1}, \text{server}) \wedge AL(\text{server}, \text{serverroom}) \wedge SA(\text{employee}, \text{server}))$ | 20   |
| $p_{10}$ | $(\text{employee}, \text{delete}, \text{file1}, SL(\text{employee}, \text{staffoffice}) \wedge AL(\text{file1}, \text{server}) \wedge AL(\text{server}, \text{serverroom}))$                                         | 20   |
| $p_{11}$ | $(\text{employee}, \text{logout}, \text{server}, SL(\text{employee}, \text{staffoffice}) \wedge AL(\text{server}, \text{serverroom}))$                                                                               | -10  |
| $p_{12}$ | $(\text{employee}, \text{enter}, \text{mainarea}, SL(\text{employee}, \text{staffoffice}))$                                                                                                                          | -10  |
| $p_{13}$ | $(\text{manager}, \text{enter}, \text{saferoom}, SL(\text{manager}, \text{staffoffice}))$                                                                                                                            | 20   |
| $p_{14}$ | $(\text{manager}, \text{open}, \text{safe}, SL(\text{manager}, \text{saferoom}) \wedge AL(\text{safe}, \text{saferoom}))$                                                                                            | 10   |
| $p_{15}$ | $(\text{manager}, \text{enter}, \text{staffoffice}, SL(\text{manager}, \text{saferoom}))$                                                                                                                            | -10  |

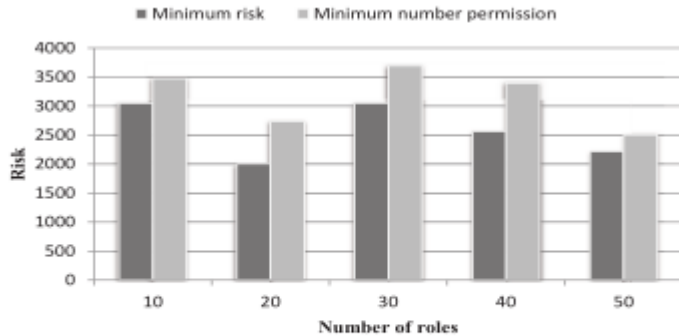

**Fig. 5:** Comparison of risk exposure for minimum risk method and minimum number permission method.

Table 2 shows that the physical access control, cyber access control, and the interaction access control are unified in the TAAC model.

Figure 5 shows that for preventing insider attacks in the policy enforcement phase, the proposed method in this study is better than providing the role that minimizes the number of extra permissions.
